# Supplementary material
Source: publisher figshare collection journal article supplement (https://gsapubs.figshare.com/articles/dataset/_/21919395)
Supplement: Supplementary file 1 [file 1]

## Sheet: Sheet1
	Table S1. Concentrations of Trace Elements in Quartz from the Gold Deposits at Kalamaili
			Li	Be	B	Na	Mg	Al	P	K	Ca	Ti	Mn	Fe	Cu	Ga	Ge	As	Se	Rb	Sr	Sn	Sb	Cs	Ba
Deposit/Stage	Samples/Spot No.		(ppm)	(ppm)	(ppm)	(ppm)	(ppm)	(ppm)	(ppm)	(ppm)	(ppm)	(ppm)	(ppm)	(ppm)	(ppm)	(ppm)	(ppm)	(ppm)	(ppm)	(ppm)	(ppm)	(ppm)	(ppm)	(ppm)	(ppm)
Jinshuiquan/Stage II	JSQZK2301-14-2	69.765	0.230616	0	2.34237	32.8742	36.4273	217.53	16.0986	36.6603	1396.94	0.554428	1.70852	129.634	0.032645	0.0371482	2.05691	0.438585	0	0.241216	1.89443	0	4.75608	0.0598783	0.567281
	JSQZK2301-14-6	50.1378	0.0964947	0	2.4821	25.0512	72.7682	126.076	26.9013	24.9901	1398.12	1.75334	3.03959	234.219	0	0.000154007	1.49748	0.78087	0.585444	0.0674222	2.44731	0.0159427	1.88525	0.0308128	0.659342
	JSQZK2301-14-7	48.3264		0	1.85129	20.1924	29.1905	132.319	10.4306	28.134	1340.86	1.40127	1.15274	109.727	0	0	1.93948	1.28525	3.57877	0.0236059	1.344	0.00384974	1.86319	0.0181782	0.682026
	JSQZK2301-14-8	64.3285	0.0384724	0	0	20.8638	2535.05	168.247	0	43.4261	11075.6	1.33367	94.9853	7768.85	0.172427	0.0171004	1.9509	4.58994	0	0.142171	66.8691	0.0141368	2.26303	0.0202445	0.518779
	JSQZK2301-14-16	90.6076	0.00740892	0	0.443527	32.7534	13.7884	205.529	29.0882	57.8468	1051.07	3.04594	0.45591	29.5414	0	0.0298015	2.30441	2.91589	0	0.216569	0.727076	0.0291221	1.73759	0	0.619318
	JSQZK2301-14-19	61.8291	0.400453	0	2.26293	27.9564	34.5376	163.713	9.4458	33.4723	1532.97	2.04173	1.38446	128.305	0	0.0388725	1.93066	8.87993	3.28926	0.0757242	1.47619	0.0265192	3.17202	0	0.219086
	JSQZK2301-7-1	35.8334		0	0.0809869	29.9336	52.6267	66.0463	15.7555	5.89982	1246.02	0.0133164	2.66533	94.2662	0	0	1.62835	1.15329	2.7924	0	1.49711	0.0335048	1.40179	0.0215038	0.33987
	JSQZK2301-7-3	107.694	0.222157	0	2.21739	56.8087	11.8918	256.83	2.20657	50.6631	828.872	1.57146	0.484893	18.8606	0.199533	0.0153663	3.13447	2.23299	0	0.166892	1.39462	0.0628171	7.8928	0.0416793	0.479447
	JSQZK2301-7-4	148.442	0.290701	0.106631	1.51459	49.0065	7.62375	396.162	23.2962	99.1446	989.167	2.42699	0.23567	9.71589	0	0.0331324	2.1794	0.657456	0	0.336538	0.660007	0.0317587	2.37813	0.0209648	0.819242
	JSQZK2301-7-5	81.2994	0.147222	0.108642	0.460267	48.9537	13.6601	177.641	35.5608	32.1985	1199.6	0.569538	0.676338	28.9379	0.119801	0.052684	1.60789	12.0968	0	0.0998294	0.762413	0.0213326	1.69786	0	0.359579
	JSQZK2301-7-6	229.362	0.0195935	0	1.20363	126.699	29.4201	521.595	37.0996	102.643	1059.18	3.09811	0.945895	55.4623	0	0.131602	1.7787	1.0377	0	0.319939	2.29372	0.0210103	1.76769	0.00867765	1.05947
	JSQZK2301-7-7	68.3116		0	6.95039	31.1019	4.4944	151.924	24.5375	37.2098	912.45	0.540183	0.0931916	3.21697	0.178761	0.0137569	2.23583	0.365239	0	0.0579087	0.614144	0.026907	2.67903	0.0292111	0.555957
	JSQZK2301-7-9	60.6583		0.1323	0	23.827	6.85863	141.168	237.717	36.8313	1395.54	1.45189	0.525467	12.4088	0.420525	0.0286382	1.9104	1.21754	0	0.0757858	8.20485	0.0348685	1.37901	0.0197782	0.584756
	JSQZK2301-7-11	163.942		0	0	113.774	311.491	339.558	24.7854	50.1685	1813.98	5.52376	11.7938	559.38	0	0.0193259	1.93124	0.775219	0	0.213798	8.06544	0.01836	1.53847	0.0334679	0.851158
	JSQZK2301-7-13	189		0.132774	1.44347	149.342	350.791	346.427	350.405	39.6584	2642.95	1.65462	14.9371	616.303	0	0.051377	2.14599	0.496316	0	0.141297	17.5125	0.0422699	1.84113	0.0395857	0.881644
	JSQZK2301-7-14	59.3368		0	1.81825	39.0406	126.284	113.875	51.932	20.2962	1483.05	1.1889	5.98929	168.716	0	0.0214316	1.89392	1.25521	1.71854	0.0562433	5.19255	0.0297017	1.46068	0.00245032	0.530841
	JSQZK2301-7-15	158.992	0.243247	0	1.73373	109.959	6.38729	432.939	14.8002	48.7894	958.44	1.70428	0.218478	6.81599	0	0.0337529	2.64027	1.23819	0	0.119626	1.12463	0.0220835	3.94226	0.04603	0.453216
	JSQZK2301-7-16	35.1277	0.0339361	0.132036	2.48918	25.7793	1.6344	73.4715	106.911	9.31445	956.966	0.426929	0	2.18082	0.427298	0	2.04797	0.329473	5.4436	0.0392483	3.58641	0.038154	1.2773	0.00932473	0.363032
	JSQZK3015-30-1	33.217	2.17968	0	0.850184	15.248	2.35211	210.834	33.3491	15.7892	1130.4	0.39806	0.469673	1.14248	0	0.0413251	1.46844	0.321419	0	0.00803541	0.723437	0.0166965	1.83064	0.0205021	0.213511
	JSQZK3015-30-3	158.387	1.03544	0	2.26905	33.4441	325.622	412.704	0	123.908	2311.59	0.368763	22.6525	638.93	0.133059	0.152033	1.7482	0.558518	0	0.362807	8.7153	0.0553602	1.36171	0.0616633	2.52435
	JSQZK3015-30-5	129.346	10.776	0	3.8085	47.7479	49.5144	619.828	23.435	70.8217	1125.42	1.48953	6.85205	137.824	0	0.0218949	3.44117	1.10515	4.66379	0.123079	2.66694	0.0344009	6.03336	0.051147	1.02734
	JSQZK3015-30-6	201.709	1.60049	0	4.45488	72.4964	1.37319	594.439	15.5354	127.612	1090.42	1.13276	0	4.60127	0.157831	0.0318072	2.37358	1.50666	4.28897	0.151917	2.59426	0.0202723	3.34904	0.0707737	0.866313
	JSQZK3015-30-7	123.853	0.26527	0	3.98633	64.3118	1.38475	292.856	18.6812	59.2762	1030.14	0.805472	0	4.57169	0.344053	0.000451646	1.73764	2.20782	5.86448	0.030659	1.03287	0.0138016	3.32034	0.0427685	0.672902
	JSQZK3015-30-8	164.089	6.44965	0	6.727	72.8347	0.320409	691.589	30.1726	84.8043	668.998	1.26031	0.0661975	0.940121	0	0.0395879	2.26804	1.85604	1.3753	0.118591	1.76464	0	5.77297	0.0490583	0.450492
	JSQZK3015-30-9	177.245	1.61201	0	3.58733	28.2465	7.94429	681.352	27.0502	147.387	858.124	0.407617	0.141599	10.44	0	0.0719903	2.61113	1.05314	0	0.258542	1.89529	0.0419481	3.25814	0.0773698	2.44678
	JSQZK3015-30-12	109.702	1.74976	0	2.85048	37.208	20.5624	345.332	5.49093	70.7445	1237.28	0.951343	1.01938	33.6647	0.441225	0.0115106	2.37008	1.23334	0	0.194962	12.7917	0.0225847	2.00878	0.0459812	1.38849
Shuangquan/Stage II	ZK1601-8-1	137.513	0.233936	0.453085	5.07121	42.3014	15.8452	317.796	17.2218	94.9782	1307.85	0.895691	0.264361	5.06938	0	0.0948952	1.29789	1.52095	0	0.153764	1.25266	0.00169981	4.04988	0.058987	2.34273
	ZK1601-8-2	95.0184	0.314685	0	4.65641	80.9458	2.06797	71.9365	27.3828	13.7579	1061.72	0.536782	0.156414	0.249001	0	0.0173785	0.602769	0.709447	3.41315	0.0661505	0.436949	0.00602756	1.44874	0.0234073	0.729008
	ZK1601-8-3	134.39	0.0276288	0	5.18244	87.7127	3.76168	155.668	21.1422	46.6499	1044.5	0.372026	0	2.69432	0.225463	0.00799265	1.09208	0.814059	0	0.0628351	0.821084	0.00814847	1.59737	0.0525433	1.31703
	ZK1601-8-4	132.146	0.337964	0	5.83185	88.7971	15.596	174.488	14.8978	43.0111	1231.07	0.0280907	0.475392	3.97995	0	0.0703039	1.2016	1.68382	0	0.268715	1.10306	0.0593846	2.90459	0.0781394	1.22359
	ZK1601-8-5	121.636		0	2.87369	51.7005	7.52733	214.576	28.0966	69.9355	1085.51	0.0579327	0.274542	4.62241	0	0.0100311	0.943911	0.937216	0	0.200837	0.704573	0.0559256	1.3075	0.0220584	1.26767
	ZK1601-8-6	43.1037	0.026213	0	3.6245	30.5074	1.25671	90.01	6.98887	12.5701	1239.6		0.299329	1.70078	0.28734	0.273582	0.942129	0.623285	1.17176	0.0324844	0.660444	0.0128108	1.61886	0.0429392	0.494529
	ZK1601-8-7	65.9738		0	0.84866	51.0611	0.634216	109.627	32.972	14.9126	1141.21	0.292418	0.18789	0.712919	0.0612881	0	1.45542	0.359738	1.41334	0.0411244	0.75993	0.0255988	2.54478	0.0200445	1.10374
	ZK1601-8-8	70.7879		0	4.30377	41.218	3.30807	131.234	31.9245	29.5698	875.363		0.18922	1.73309	0	0.026203	1.31312	0.518162	0.858723	0.0826137	0.554043	0.0189406	1.99812	0.0289013	0.845461
	ZK1601-8-9	86.8509	0.128758	0	0.580946	44.1394	2.73951	187.629	12.2484	42.5827	530.675	0.216841	0	0.796119	0.468577	0.0109188	1.17855	0.357238	2.17376	0.0642362	0.643942	0.0172384	1.97589	0.0332769	1.22073
	ZK1601-8-10	157.57	1.15687	0	1.38505	38.3678	15.433	343.318	20.989	118.045	1127.49	1.63874	0.399691	9.63461	0	0.0294916	0.770646	0.78045	4.42456	0.309214	1.14425	0.0350213	2.27654	0.0343753	3.54991
	ZK1601-8-11	114.87	0.161796	0	4.07817	52.7441	8.44888	144.751	14.2683	61.964	762.385		0.355393	5.94607	0	0.044162	0.918744	1.25483	0	0.103497	1.249	0.00731191	2.26311	0.0449144	1.29039
	ZK1601-8-12	50.8425	0.564101	0	2.95524	34.6845	1.46581	94.5061	10.3153	15.5939	524.34		0.0371418	0.946585	0	0.00075303	1.09644	0.1562	1.14164	0.0898026	0.764343	0.0193827	2.05419	0.0315856	0.752867
	ZK1601-8-15	239.118	0.0961891	0	1.48458	15.1341	22.8514	545.121	40.6082	223.888	669.809	2.3395	0.162719	21.5184	0.409138	0.1636	1.2137	0.569737	0	0.719248	0.773083	0.0170674	1.43907	0.0530966	3.58112
	ZK1601-8-20	216.482	0.0925261	0	8.63125	89.7616	1.53331	435.166	1.61635	126.628	760.62	0.983635	0	1.24188	0.438587	0	1.40152	1.04717	1.48956	0.153857	1.21154	0.0270266	3.04691	0.072829	1.7721
	ZK1601-27-2	220.734	1.82889	0	6.72828	69.9357	2.68382	525.468	9.29206	148.969	637.57	0.933003	0.0707635	2.98833	0	0.0110534	1.53205	1.43741	1.02243	0.219229	1.33885	0.00506161	2.91662	0.0715334	2.06219
	ZK1601-27-3	202.84	1.20187	0	4.85826	82.0221	0.591006	495.322	20.0496	119.616	506.728	0.0599696	0.172915	0.725357	0.397071	0	1.40024	0.956656	1.41938	0.153812	0.70931	0	3.25447	0.126554	1.08188
	ZK1601-27-5	97.3426		0	4.64317	70.7959	2.46934	110.221	11.1026	26.5467	584.758		0.321631	1.29036	0	0	1.27496	1.13529	0	0.0294381	0.950363	0.0345243	1.80507	0.0400073	0.728514
	ZK1601-27-6	59.4851		0	5.8206	55.4922	0.448207	60.1049	22.7235	3.9929	655.251		0	0	0	0	1.32733	0.699625	0	0	0.759607	0	1.66342	0.0168131	0.446927
	ZK1601-27-7	93.0904		0	9.81414	88.4928	0.485111	61.4771	69.5703	4.59756	896.867	0.192191	0.313426	0	0	0.034797	1.37364	0.847982	4.38729	0	0.721892	0	1.43876	0.0155198	0.648769
	ZK1601-27-8	65.6343		0	4.30741	40.2316	2.39844	108.068	13.2018	25.4028	621.358		0	1.37422	0	0.042919	1.09912	0.720475	0	0.0741208	0.9527	0.00437655	1.46429	0.00891279	0.966261
	ZK1601-27-9	60.3643		0.129835	2.38041	15.3487	3.45678	170.888	0	45.0156	631.587	0.469576	0	1.78897	0.283433	0	1.37449	0.35228	0	0.0427933	0.7014	0.0385996	1.6253	0.0274129	0.948171
	ZK1601-27-11	49.436		0	2.32562	17.7441	26.0215	140.338	18.2378	31.6919	805.805	0.0769115	1.78007	24.3732	0	0	1.79334	0.955103	0	0.0678828	1.14494	0	2.67746	0.0226183	1.37314
	ZK1601-27-14	143.908		0	6.14409	29.8171	2.16743	379.713	3.3245	114.091	486.498	0.505078	0.0810827	2.73028	0.144078	0.0118379	1.46869	1.33701	0	0.162595	1.48802	0.0299756	2.47732	0.0350348	2.05934
	ZK1601-27-15	36.8325		0	3.36808	17.302	1.9839	96.6671	19.3874	19.5305	467.93	0.169912	0.140816	0.680111	0	0.0095278	1.21583	0.285658	0	0.0347099	0.83865	0.00799399	1.53913	0.0200541	1.07376
	ZK1601-27-16	73.2008	0.600047	0	1.56669	25.0879	7.10088	197.474	6.76433	47.5128	453.723	0.00654636	0.104647	2.6228	0.0555978	0.0252578	1.65221	0.503724	0.587275	0.128132	0.940895	0.0487439	2.2547	0.00214405	3.17831
	SQPM2-3-1	138.17	0.193548	0.315491	4.59387	21.2316	11.4442	394.557	25.8134	116.745	995.052	0.833081	0.97319	10.3675	0	0.0160401	1.46456	1.93143	0	0.246146	0.867463	0.0391573	2.21556	0.0882104	1.61946
	SQPM2-3-2	33.6368	0.0264984	0	3.79941	10.8515	3.04105	133.051	21.3348	22.7588	1295.28	0.0630272	0.15377	2.72452	0	0.0222479	0.931222	1.04628	0.175044	0.0670158	0.524785	0.032411	1.44278	0.0427806	1.06037
	SQPM2-3-4	50.6001		0.383933	12.6032	45.2518	13.2857	101.619	11.9547	5.34831	1200.82		0.519049	2.27754	0	0.0125312	1.64413	1.0375	0.776433	0.0452964	0.794679	0	1.76822	0.046142	0.405619
	SQPM2-3-5	17.5948	0.0502753	0.131614	2.90519	14.5158	2.13893	57.36	2.66329	3.0287	1075.61	0.361181	0.283934	0.809679	0	0.0111384	1.27007	0.569823	0	0.0747002	0.338845	0	1.05334	0.00664346	0.0766927
	SQPM2-3-6	66.8292		0	8.72989	27.2129	1.93036	165.339	5.90588	39.6162	1045.87	0.0674557	1.24194	1.48126	0.325542	0.0136235	1.31226	1.06149	0	0.0260428	1.27284	0.00014935	0.823479	0.0674512	0.887259
	SQPM2-3-7	157.781	0.0231353	0.118383	3.30536	34.6035	6.08539	402.377	43.5708	123.155	879.536	0.198378	0.365186	6.64038	0	0	1.31115	1.15189	0.799701	0.218514	0.89809	0.0116611	1.67827	0.112011	1.96577
	SQPM2-3-8	129.896	0.0390669	0	47.9075	35.3224	3.43689	312.632	22.513	94.5342	832.804		2.20518	4.41201	0.236671	0.00679159	1.82024	13.6665	0	0.141789	0.964077	0.67053	1.52172	0.0505605	1.0058
	SQPM2-3-9	44.7006		0.356547	3.73553	19.7934	3.26874	135.783	25.334	24.9073	872.193	0.434292	1.05344	6.36689	0	0.0142483	1.1341	1.6468	0	0.0696371	0.588923	0.0131829	1.14784	0.00159317	0.655107
	SQPM2-3-10	89.0456	0.0465252	0	8.86299	19.0113	1.39873	246.968	19.5335	69.9877	1000.01		0.28972	1.44194	0.565685	0.0137905	1.60877	2.22834	1.51709	0.212967	0.741188	0.0182496	1.06348	0.0658309	1.16239
	SQPM2-3-11	37.3247	0.0277708	0	4.30119	17.4701	4.19613	142.686	39.7693	19.8268	712.966	0.192275	0.351005	4.21307	0	0	1.51621	1.59853	0	0.0608253	0.789937	0.0292178	1.77107	0.0574279	0.505911
	SQPM2-3-12	54.9334	0.0803093	0	1.62275	18.2746	2.20521	172.309	5.70348	36.5785	808.508		0	0.0538832	0.0358282	0.00809126	1.86195	0.452047	2.86476	0.177921	0.615054	0.00960932	1.25241	0.0417106	0.850236
	SQPM2-3-13	100.421	0.177438	0.247693	2.59288	23.1457	5.93364	292.515	24.9261	77.0974	653.761		0.642387	7.29999	0.0473137	0.0360127	1.59494	2.49999	0.995319	0.147442	0.636002	0.00471335	2.11665	0.0549361	1.0095
	SQPM2-3-14	81.772		0	2.26897	21.6436	2.37662	252.737	24.0193	60.1284	825.854		0.28398	4.58654	0	0	2.09795	1.62119	0.559672	0.0677009	0.808317	0.0311294	2.0163	0.0424724	0.973446
	SQPM2-3-15	82.8021		0.215193	3.66872	29.8306	2.80426	253.154	21.7356	52.9714	602.581	0.455896	0	3.17141	0.221627	0	1.79084	5.40584	0	0.0905287	1.20969	0.0252403	2.33265	0.0338442	1.0379
	SQPM2-3-16	60.9365	0.0189187	0	10.4409	25.9518	0.367905	210.882	29.2999	34.9658	697.472	0.301034	0.241041	1.48766	0.311522	0	1.80694	0.710331	0	0.0185428	1.56295	0.0219324	1.96406	0.105508	0.851893
	SQPM2-3-17	107.384	0.0869531	0	15.6524	36.3935	1.77848	273.148	11.247	70.9038	624.693	0.623235	0.26042	2.98834	0	0.0227214	1.61147	2.8132	0	0.0804194	0.962991	0.0237462	1.28837	0.0624688	1.1341
	SQPM2-3-18	124.928	0.106423	0	8.47683	26.7256	5.51327	391.959	36.0525	98.0959	608.853	0.604583	0	12.0783	0	0	1.61483	5.08941	0	0.129665	1.16045	0.0374327	2.14685	0.0512984	1.25681
	SQPM2-3-19	157.307	0.0292049	0	5.0708	31.1063	6.72255	422.6	33.2576	126.172	728.687	0.914532	1.9051	15.3236	0.0932291	0	2.41243	1.53927	0	0.250665	0.870357	0.0125829	1.96474	0.0495788	1.42895
Nanmingshui /Stage I	NMS4PM1-3-1	10.4939		0	2.84701	6.55259	0.918333	12.9056	60.774	3.94135	944.754	0.613356	0.782427	2.34829	0	0.00528281	0.232601	0	5.28922	0	0.0439438	0.0242551	0.128455	0.0103438	0.0182582
	NMS4PM1-3-2	22.7745		0	0.813672	21.0648	0.0150499	15.7972	36.3709	1.70972	540.393	0.102123	0.244328	0.335715	0.325091	0.0533879	0.33993	0.519218	1.405	0	0.0570149	0.0685921		0.0080034	0.0201011
	NMS4PM1-3-3	45.4796		0	9.33395	17.2627	0.0392555	83.5223	20.5866	28.2169	755.376	0.347152	0.247771	0.753848	0.0207009	0	0.252684	0.739355	0.576789	0.062219	0.268634	0.0365423	0.0643487	0.011338	0.88293
	NMS4PM1-3-4	21.8673		0	5.56364	10.1451	0	51.3788	40.6425	11.7222	687.217	0.325122	0.266361	0.718316	0.261054	0	0.306906	0.150494	0	0.0901763	0.193523	0.00734211	0.0855436	0	0.358882
	NMS4PM1-3-5	21.0982		0	1.30354	10.8952	1.05353	38.7895	38.1618	10.203	913.142		0.450765	0.789087	0	0.00149108	0.297498	0.499531	2.71923	0	0.466895	0	0.0843939	0.0219881	0.411309
	NMS4PM1-3-6	31.254		0	7.80338	20.6801	0.245648	43.4717	24.004	10.5739	590.711	0.421605	0.0500324	0	0.0798931	0	0.154166	0.939371	0	0.00270122	0.17087	0	0.0567168	0.0184757	0.383589
	NMS4PM1-3-7	12.0372	0.0756272	0	6.19152	7.64682	0.737657	46.6621	22.8131	4.31476	695.601		0.255981	0.250488	0.180269	0	0.387753	0.0816845	1.75549	0	0.615448	0.037076	0.0343873	0.0090638	0.351129
	NMS4PM1-3-8	7.82482	0.471209	0.460844	5.12835	3.27451	1.08132	34.2458	16.7977	4.07911	792.206		0.825467	9.62241	0.184878	0	0.218186	0.0619319	0	0.017186	0.441025	0.0135655	0.0140073	0.023481	0.162533
	NMS4PM1-3-9	7.56242	0.0469714	0	0.956824	6.66315	0.699739	47.4017	34.7912	0.852293	917.79	0.626912	0.294832	0.592603	0	0.0536253	0.490997	0.480007	0	0	0.714374	0.077495	0.0715586	0.0369693	0.539923
	NMS4PM1-3-10	21.9903	0.490626	0	0	16.4246	0.683981	73.3935	32.8259	5.07507	710.31	0.347598	0.382656	0.44011	0	0.0120102	0.197878	0	1.94755	0.0391375	1.67139	0.014691	0.186523	0.0116093	1.47122
	NMS4PM1-3-11	17.024	0.163133	0.281717	0	12.5129	0.143743	48.2946	26.5025	4.34795	1027.34	0.941779	0.251273	0.0344951	0	0.00515178	0.215962	0	3.85807	0.0473188	0.915516	0.0176579	0.0911799	0.0101046	0.915776
	NMS4PM1-3-12	11.9268		0	5.42131	6.08299	0	13.826	18.3541	5.84383	727.904		0.175182	0.417315	0	0.00118272	0.055728	0	2.65575	0	0.0357368	0.0218528		0	0.0173026
	NMS4PM1-3-13	11.1838		0.121794	3.81454	0.686794	1.11518	49.6828	28.4585	10.497	791.923	2.31615	0.353055	1.31216	0.57404	0.0276542	0.173583	0.0649577	0	0.00576923	0.392245	0.0340239	0.123826	0.0155202	0.396401
	NMS4PM1-3-14	4.49595	0.0847604	0	0.105695	0.361878	1.53905	22.3865	23.7822	4.04932	867.89	0.73387	0.129796	0.0778346	0	0.00763275	0.126266	0	0	0	0.110775	0.0204848	0.00516956	0.00990014	0.0880597
	NMS4PM1-3-16	20.1452		0.127684	0.465554	18.2732	0.141319	27.1263	49.6318	1.87205	722.8	2.44515	1.32989	1.65876	0	0.0167249	0.28185	0.155527	0.766691	0.00427502	0.100718	0.0298773	0.013731	0.0124633	0.043196
	NMS4PM1-3-18	1.62609		0	4.27811		0.647294	20.0459	49.7273	1.62609	809.788	4.96728	0.336856	2.85433	0	0.0537422	0.156587	0.324978	2.33323	0.0527722	0.0880617	0.0155277	0.0736741	0.0251217	0.0561543
Nanmingshui/Stage II	NMS3PM1-14-1	41.5229	0.497292	0	3.09935	13.2063			62.0019	27.8194	945.82		0.412232	3.03411	0.596883	0.075012	2.85303	0.892132	0.969086	0.0922146	0.0685793	0.0416589	1.8689	0.00160684	0.373465
	NMS3PM1-14-2	116.798	0.100092	0	8.06092	37.4681	0.311218	259.23	0	79.2294	344.348	0.995552	0.218355	0.0228482	0.242145	0.0589869	2.47945	1.0915	0	0.180643	0.253961	0.0381619	0.778169	0.0138481	0.214304
	NMS3PM1-14-4	55.8543	0.168778	0	6.94368	14.0287	1.35652	167.282	71.051	41.6568	1012.73		0.0435202	1.26851	0.435471	0.0259697	2.78152	0	0	0.126964	0.159234	0.00855086	4.74405	0.0133659	0.0658298
	NMS3PM1-14-5	63.146	0.0803133	0	0	28.7974	0	140.213	52.3203	34.2683	643.248		0.261951	0.133725	0.616542	0	2.42471	0	1.01306	0.236545	0.254389	0.00667986	1.1607	0.0297367	0.0972457
	NMS3PM1-14-6	44.8533		0	18.4583	43.1651	1.35921	27.9862	65.7937	1.68823	775.759		0.220353	0.0634645	0	0.020146	1.63377	0.547305	0	0.0319676	0.132289	0.0204396	0.35278	0.00927174	0.0567412
	NMS3PM1-14-7	56.6996	0.238795	0	3.65987	43.7002	2.41091	42.2375	19.2016	12.7606	1184.09		0	1.15385	0	0	1.78458	0.266914	0	0.0204729	0.175868	0.0412221	0.44852	0.0187908	0.0656543
	NMS3PM1-14-8	64.3561	0.0442624	0	1.09965	64.3118	1.14858	17.1986	45.294		637.912		0.0100714	0	0.230766	0	0.519558	0.817224	0	0.00274135	0.125873	0	0.198489	0.00916688	0.10549
	NMS3PM1-14-9	55.973	0.130577	0	3.78639	26.9061	0	136.867	23.9631	28.9363	764.362		0.284274	0.470034	0	0	2.44889	0.704655	3.8455	0	0.0971682	0	3.53641	0.0262929	0.0573828
	NMS3PM1-14-10	53.5034	0.0501616	0	2.936	24.0718	0.457643	142.392	39.6599	29.3814	500.606	0.924645	0.0462268	0.823201	0.721671	0.0362778	2.78835	0.19345	4.7826	0	0.13945	0.006067	7.78956	0.021804	0.0380637
	NMS3PM1-14-11	10.0449	0.00854711	0	6.00712	7.52988	3.55502	44.131	57.754	2.50649	552.136	0.640702	0.30201	3.48509	0.156664	0	1.84824	0.894713	5.52331	0	0.162601	0.0371962	0.362317	0	0.0581275
	NMS3PM1-14-12	27.3063	0.094213	0	0	18.5621	0.16653	41.3948	65.0176	8.65	550.471	0.0231951	0.0184734	0	0	0	1.97518	0.576574	0	0.0222531	0.109429	0	0.672088	0.0193359	0.0626674
	NMS3PM1-14-13	87.05		0.169699	7.17367	47.1068	0	158.25	20.5702	39.9432	572.441	1.05576	0.0879228	0.014983	0	0	2.6535	1.78221	0.33186	0.0569366	0.363643	0.0014902	3.74769	0.000722582	0.244741
	NMS3PM1-14-14	60.5997		0	4.15772	34.1925	0.223162	147.814	33.5132	26.4072	484.78		0.0682195	0.312616	0.0503042	0.021327	2.80014	0	0.212609	0	0.271932	0	4.50618	0.0149972	0.0464858
	NMS3PM1-14-15	40.4958	0.0880435	0	3.10525	33.0148	1.75285	42.3494	25.6186	7.39298	594.522		0	0	0.148198	0.00337221	1.68147	0.866905	0	0.0336341	0.0938677	0.0309368	0.41689	0.00262613	0.0470001
	NMS3PM1-14-16	30.4343	0.151312	0.561085	9.80879	29.8116	0.236345	55.0364	36.4459	0.471416	520.12	1.48598	0.303521	0	0.0235858	0	1.90332	0.406335	0.72385	0.00795937	0.0730495	0.0439518	0.36046	0.000602735	0.00520601
	NMS3PM1-15-2	23.5769		0.333352	3.22097	20.4235	5.75215	49.7702	0	3.15343	913.762	0.555202	0.0858784	0.633936	0.503524	0.0409842	1.1149	1.21669	4.2528	0.00170287	0.452572	0	1.16613	0.0377239	0.243779
	NMS3PM1-15-3	68.8828	0.117636	0.154948	7.39351	56.7363	4.29256	53.1698	48.5008	12.0288	1021.1	2.18635	0.120322	2.74177	0.662931	0.0435624	1.21541	0.791208	0	0.0326518	0.406108	0	1.16184	0.0210504	0.194695
	NMS3PM1-15-5	64.0948		0	6.67239	52.4591	1.54168	60.5175	30.9254	11.6357	866.214	1.07604	0.412031	1.07068	0.380832	0	0.707704	0.0350052	1.60947	0	0.632158	0.044052	1.13353	0.0145365	0.235233
	NMS3PM1-15-6	51.8		0	0	47.6476	2.10335	47.7458	41.6785	4.1524	945.639	0.198067	0	0.565222	0	0.00999748	1.45955	1.37312	0	0.0477959	0.437887	0	1.15298	0.0093562	0.252678
	NMS3PM1-15-7	21.4644	0.223965	0	3.45622	15.417	0.848156	65.6558	6.76588	5.82344	850.177	1.01953	0.0321972	0	1.03717	0	0.506577	0.343946	1.65337	0	0.114832	0.0201954	1.85083	0.0144823	0.105675
	NMS3PM1-15-8	15.9013	0.214652	0	2.73005	14.9217	5.457	28.4259	85.9369	0.76487	378.239		0.286659	2.4424	0	0	0.789524	0.35964	2.30055	0	0.204854	0	0.399671	0.0141452	0.0716793
	NMS3PM1-15-9	37.9764		0.30935	4.04658	20.287	4.31842	79.8167	3.4398	17.6895	789.951		0.368539	1.07547	0	0.00137745	1.76409	0.421609	0.66659	0.054892	0.16322	0.0377124	0.994537	0.0134637	0.208008
	NMS3PM1-15-10	61.8435		0.146571	3.4458	37.0305	2.67128	95.8108	51.5138	24.813	704.622		0.267756	1.63242	0	0.00661064	1.78652	0.487765	0.443364	0.0832948	0.257122	0	1.50548	0.026751	0.450758
	NMS3PM1-15-11	85.5067		0	1.3058	57.4394	3.2324	107.524	45.9171	28.0673	469.663	0.801995	0.989445	1.33605	0	0.016071	1.64559	0.384731	0	0.121734	0.508216	0.029238	1.6108	0.018911	0.381423
	NMS3PM1-15-12	51.2811		0.139506	5.79067	43.983	5.84432	58.7716	47.3389	7.29813	716.523		0.110042	0.285232	0.590957	0	1.33237	0.32409	4.53289	0	0.188819	0.00809281	1.38228	0.0145728	0.248586
	NMS3PM1-15-13	40.9948	0.307146	0.290618	6.92567	30.273	1.45652	48.0424	48.3538	10.4146	1089.69		0.239299	0.634963	0	0.0210552	0.963471	0.240287	1.37242	0	0.311681	0.0540933	1.26381	0.000595468	0.332205
	NMS3PM1-15-15	47.4384	0.186025	0.0256197	1.20674	42.0131	0.469349	36.5757	29.8202	5.2393	1051.58		0.0652644	0	0.207837	0	1.33322	0.198708	0	0	0.385571	0.00174177	0.902108	0.0176668	0.143443
	NMS3PM1-15-16	33.1803	0.653704	0	2.20032	31.6505	0.597465	132.755	43.1755	0.876096	940.159	3.27379	0.215525	0.760117	0.125382	0.00594542	2.04449	0.329195	0	0	0.104843	0.0353422	1.28234	0.00657866	0.105925
	NMS7PM1-3-1	76.7268	0.175101	0	5.29098	52.1985	65.5059	199.411	64.8224	24.3532	953.81	1.34653	1.35103	114.627	0	0.0108474	0.705276	1.36448	0	0.0781165	0.0840327	0.10303	0.0471521	0.00982547	0.0786812
	NMS7PM1-3-3	56.362		0	3.62518	46.6407	0.844036	108.573	33.4702	9.72129	747.483	0.56198	0.158005	0.653532	0	0.013779	1.56582	0.664519	1.30407	0	0.0665273	0.0172655	0.297158	0.00222719	0.0193616
	NMS7PM1-3-4	18.8152	0.0348694	0	0	15.687	0.712173	45.0636	63.7306	3.09329	853.856		0.114053	2.06929	0.0724814	0	1.14929	0.364115	0	0.0758032	0.0904913	0.0340482	0.142231	0.0163901	0.0527054
	NMS7PM1-3-5	32.4971	0.0808834	0.313388	3.57094	30.0384	7.55697	46.8288	46.3243	2.37782	1260.66	0.532249	0.302936	0.19625	0	0.00927094	0.90099	1.08345	0	0	0.175311	0.0730804	0.209289	0.00229722	0.0221729
	NMS7PM1-3-6	28.4438		0	4.41235	21.9105	1.13828	50.752	21.1796	6.5333	765.929	0.635018	0.0759054	2.50952	0	0.0144217	1.26582	0.724824	0	0.0249325	0.1622	0.0510389	0.21343	0.00463211	0.0378725
	NMS7PM1-3-7	66.9146		0	3.97706	59.3876	1.90015	116.774	39.9936	7.52702	268.288	0.915107	0.203	0.0571533	0	0.0455907	1.42025	1.14518	0	0.0542876	0.198549	0.00908992	0.14577	0.0231015	0.0130379
	NMS7PM1-3-8	21.7842	0.172358	0	5.68908	17.1066	0.5135	28.9771	61.991	4.50522	704.661	0.750942	0.215295	1.47857	0	0.0176175	0.884266	0.600711	0	0.0271482	0.0494184	0.0175671	0.0243474	0.0210983	0.0107957
	NMS7PM1-3-9	41.024		0	5.04733	29.5282	1.23763	33.416	53.2836	11.4957	1026.3	0.0912691	0.185529	0.189601	0	0.00885685	0.976866	0.606151	0	0	0.112226	0.0230424	0.120802	0.0226704	0.0215513
	NMS7PM1-3-10	28.8777	0.0748896	0	2.70142	22.0506	1.81739	49.9591	47.987	6.75218	738.173	0.17483	0.381396	0.23881	0.22794	0.0453442	1.30943	0.640013	0	0	0.155772	0.0436985	0.187606	0.0609926	0.0397246
	NMS7PM1-3-11	42.0553		0	0.737127	34.7299	0.705668	40.1207	38.2717	7.32537	754.048	0.514771	0.198785	2.33577	0.424704	0.0125421	1.25654	1.0426	2.77561	0.0627622	0.225738	0.0130878	0.290557	0.0235752	0.0751856
	NMS7PM1-3-12	29.0705	0.442716	0.128283	4.20809	25.7375	4.31091	55.3046	51.3957	2.89024	677.688		0.195982	0.445197	0.147861	0	0.781091	0.554393	5.22023	0	0.0941137	0.0237611	0.0952171	0.0921889	0
	NMS7PM1-3-13	42.2657	0.127903	0	0.901543	27.2724	0.686471	71.4431	13.7071	14.8654	560.839	0.214284	0.357575	0.48033	0	0.0128352	1.34853	0.883846	0	0.0361134	0.249069	0.00491871	0.233269	0	0.0497639
	NMS7PM1-3-14	59.0397	0.390391	0	1.91124	48.0709	4.08421	98.406	35.1944	10.5784	805.108		0.338359	1.46446	0.0288633	0	1.87472	0.602106	0	0.0252402	0.266602	0.00919142	0.224449	0.0195298	0.0493644
	NMS7PM1-3-15	25.0057	0.0406949	0	0	21.3844	0.916836	39.0455	21.4781	3.58055	793.903	0.582957	0	0.361306	0	0.00626051	1.52806	1.00921	4.48685	0	0.0601898	0.00391575	0.174149	0.00170296	0.0104849
	NMS7PM1-3-16	42.1801	0.0614786	0	1.51663	32.4343	0.403386	65.8394	34.1987	9.68431	873.876	0.602649	0.257079	1.57644	0.597347	0.017266	1.19649	0.804589	0	0	0.231123	0.0130384	0.263517	0.0158845	0.0201461
	NMS4PM1-18-1	44.084	0.11641	0	3.29177	41.5129	12.9861	38.2138	50.4115	2.45467	633.641		0.130224	0.41335	0	0.0100413	1.28374	0.62861	0.346006	0	0.187418	0.0792289	0.86019	0.00699416	0.127251
	NMS4PM1-18-2	48.2116	0.496503	0	3.1664	37.1757	7.31683	84.7391	17.9276	10.5394	504.082	0.954538	0.325409	3.17538	0	0.0447164	1.73358	0.680957	0	0	0.143126	0.0403042	1.03289	0.0295258	0.112028
	NMS4PM1-18-3	77.7368	0.68669	0	3.00414	64.6881	17.7286	110.599	19.9919	12.362	683.2		0.19835	1.89034	0.0996205	0.0383178	2.15249	0.50225	0	0	0.292941	0.0494556	1.38513	0.0195294	0.0759998
	NMS4PM1-18-4	119.398	6.8032	0	7.01346	79.4487	4.62391	349.422	47.4896	33.1461	890.636	0.338974	2.3793	216.13	0	0.040468	3.02386	48.9871	0.559383	0	0.714251	0.0654024	8.71384	0.025438	0.327511
	NMS4PM1-18-5	83.1123	0.924887	0.17232	16.136	65.5767	1.60633	190.182	33.6426	16.6107	1043.53	1.15202	0	0.575468	0.0985509	0.0174935	2.34012	1.88645	0.816684	0.00988772	0.267153	0	2.08352	0.103324	0.205455
	NMS4PM1-18-6	44.8077	0.0542675	0	6.74598	39.461	0.760987	50.1452	53.0918	5.29241	927.1	1.28145	0	1.04803	0	0.0203948	1.55876	1.90599	0	0	0.134063	0.0495908	0.383243	0.0375102	0.125724
	NMS4PM1-18-7	50.038	0.899867	0	19.2872	41.5578	14.0096	94.9067	51.7176	7.58035	786.998	0.194485	0.222799	1.45766	0	0.020016	1.64054	0.712393	0	0.0169302	0.341523	0.0241711	2.86816	0.0278391	0.113095
	NMS4PM1-18-8	51.7503		0	2.90354	35.8745	10.1986	66.0156	7.89923	15.8758	783.304	0.886568	0.274421	0.785836	0.791633	0.00571944	1.09641	0.259478	4.5942	0.0181304	0.27184	0.0457612	0.85194	0.019291	0.273307
	NMS4PM1-18-9	47.5857	0.274053	0	3.46685	37.0373	4.20708	67.007	49.7229	10.2743	800.847	0.285843	0.875556	2.42718	0	0.0230818	1.61084	0.469785	0.510704	0.0419015	11.1288	0.0297566	1.43286	0.0231493	0.282528
	NMS4PM1-18-10	78.6815	0.255781	0	0	65.2114	7.85676	89.7781	32.8189	13.2143	678.495		0.48145	0.738009	0	0	1.50947	0.0461641	3.34707	0	0.368445	0	0.831427	0.0204194	0.148953
	NMS4PM1-18-11	58.7747	1.09381	0	4.88134	51.1475	1.30406	178.357	46.3446	6.53338	941.715	0.0489489	0.112671	0.216542	0.469216	0.02376	1.92644	0.10982	1.32625	0.0208786	0.0453671	0.0640916	0.802008	0.0161571	0.00948315
	NMS4PM1-18-12	42.0296	0.361024	0	2.39895	29.176	0.541339	77.0846	28.0569	12.4926	770.326		0.245079	0	0	0	1.62369	0.273772	1.61403	0	0.16654	0.0310308	0.928417	0.0142386	0.0520447
	NMS4PM1-18-13	34.5554	0.0199341	0	4.73582	26.9673	3.00646	47.5445	53.5914	7.56818	1278.63	0.486245	0.376205	2.18421	0	0.00878669	1.48253	0.768023	3.62532	0.00866916	0.31916	0.0256949	0.601489	0.00534614	0.210617
	NMS4PM1-18-14	21.9229		0.12255	5.09429	21.3482	19.5121	34.9658	34.7067	0.574693	740.045		0.0676316	2.53869	0	0	1.24098	0.269524	2.28238	0	0.116076	0.0256739	0.438238	0.0243824	0.0770431
	NMS4PM1-18-15	58.9011	0.0421402	0	3.2759	46.8849	8.17894	91.4968	42.6927	11.9741	900.038	2.58534	0.372537	2.12986	0	0	1.67318	0.440089	0	0.0210505	0.268799	0.0278569	1.48586	0.029126	0.138214
	NMS4PM1-18-16	16.6915		0	0.611459	16.269	6.81647	26.4653	31.8283	0.422451	893.012	0.355361	0.260987	0.863806	0.238333	0.008904	1.25476	2.31647	0	0.0238705	0.109515	0.0266181	0.404407	0.00832592	0.0608899
	NMS4PM1-18-17	90.2219	0.165976	0	3.25446	78.2611	4.90246	212.398	17.8271	11.7948	920.173	0.935369	0	0.353926	0	0.0287725	2.81189	0.459915	0	0.0692805	0.266621	0	2.08297	0.0302691	0.0272319
	NMS4PM1-18-18	116.362	0.361929	0	3.82082	95.7665	6.79895	325.556	44.1785	20.234	648.976	1.04282	0.0715859	0.0312436	0.340805	0	3.36845	0.704394	0	0.013759	0.318446	0.0382091	1.59873	0.0313999	0.0682671
	NMS4PM1-18-19	63.2072	0.187135	0	2.36408	52.8017	6.99511	141.045	38.8406	10.2184	668.751	0.288268	0.00109789	0.658669	0.0202873	0.00994167	2.89556	0.846169	0	0.0206621	0.289113	0.0150575	1.69141	0.0340632	0.0318648
	NMS4PM1-18-20	92.9721	0.54333	0	2.09253	77.7471	20.3768	305.034	32.4357	14.6817	771.682	0.649167	0.14508	0.814469	0.131914	0	2.715	1.33393	0	0	0.874594	0.047783	3.07088	0.058286	0.174399
Nanmingshui/Stage III	NMS4PM1-23-1	59.8958	0.0975161	0.247582	2.06034	42.6294	1.16243	92.5348	24.8727	17.1689	1104.72	0.384142	1.72706	0.725907	0.339543	0.00503181	0.435354	0.33452	0	0.0543551	0.303523	0.0294092	0.261966	0.0122079	0.272575
	NMS4PM1-23-3	79.6463		0	4.9737	37.9846	5.05243	170.576	50.8398	41.6617	1145.79	0.0624884	0.555441	1.94542	0.467043	0	0.459745	0.709187	2.48238	0.123324	1.01019	0.0316745	0.336237	0.0307005	0.519254
	NMS4PM1-23-4	116.451	0.153427	0.51069	5.83637	57.6136	5.09786	206.949	42.242	58.6843	978.899	0.392509	0.0808789	3.7456	0.0180285	0.032248	0.686974	0.47791	1.94844	0.310087	0.298641	0.0125384	0.424851	0.0172857	0.481727
	NMS4PM1-23-5	96.3068	0.0741395	0	2.48169	66.949	6.45725	57.5905	30.3431	29.2836	1227.59	0.459663	0.649141	1.74311	0.167475	0.0970938	0.805252	0.578608	8.13879	0.0154251	0.293208	0.0403359	0.462523	0.0291221	0.241005
	NMS4PM1-23-6	38.9004	0.0641889	0	0.760047	32.7762	9.62033	38.4316	40.0127	6.05996	3316.98		7.22399	15.9997	0.00977172	0.0164375	1.15031	0.177687	0.0603857	0.0440381	8.88873	0.00762592	0.524243	0.0211357	0.0371317
	NMS4PM1-23-7	72.4412	0.389445	0	4.07591	50.3983	0.688206	58.2433	15.0386	21.6535	1107.55	0.436121	0.437466	0.157851	0	0.0244021	0.588081	0.341509	0	0.0933724	0.122167	0.024246	0.265253	0.0201497	0.136119
	NMS4PM1-23-8	77.6997		0	14.1842	57.4566	8.50416	61.3181	57.8456	20.2431	1284.62	0.109737	0.298466	20.5266	0.230901	0.0429564	1.18439	0.98855	0	0	0.754457	0	0.578977	0.00274264	0.302903
	NMS4PM1-23-10	31.0244		0	2.01373	19.5745	1.19946	71.6566	31.3928	11.4499	1199.16	0.470137	0.20847	1.332	0.326495	0	0.479859	0.19309	0	0.0145498	0.229548	0.0173496	0.234381	0.0214987	0.142434
	NMS4PM1-23-11	86.4474		0	6.3908	62.4258	0.185353	110.747	39.5621	24.0217	1467.64	4.02997	0.126755	0.693209	0.662258	0	0.609183	0.62958	2.20894	0.0455784	0.309726	0.0530381	0.506594	0.0494579	0.292355
	NMS4PM1-23-12	64.4355		0	2.21506	32.4931	2.37746	117.867	18.7909	31.9423	1033.42	0.0342676	0.505287	2.73651	0.303107	0	1.12684	0.603935	0.829965	0.0742471	0.373258	0.0385633	0.570937	0.0183247	0.27651
	NMS4PM1-23-13	51.6286	0.00683989	0	3.56277	40.9425	0.384986	65.2302	39.7138	10.6793	826.096	0.598255	0.488643	1.45404	0	0.0343975	0.820108	0.337239	0.961181	0	0.201463	0.0276173	0.436955	0.00356199	0.0882609
	NMS4PM1-23-14	100.708	0.0415306	0	2.49694	38.8088	5.03297	191.003	28.0512	61.8578	1160.28		0.213385	3.51882	0.890935	0.0126682	1.20117	0.172067	2.28902	0.201528	0.536275	0.0232936	0.700787	0.0223502	0.565591
	NMS4PM1-23-15	45.8067	0.129725	0.129379	3.70462	26.849	4.50075	91.1147	32.3196	18.8279	1039.52	0.375446	1.68679	0.197399	0.563381	0.0250352	0.941027	0.376836	0	0.0587597	0.854392	0.0349039	0.410833	0.0211748	0.249353
	NMS4PM1-23-16	41.7394		0	2.71849	41.7394	2.63199	36.977	64.5484		1469.94	0.447555	0.356348	2.73566	0	0	1.38187	0.702534	3.18102	0.153262	0.446193	0.0487014	0.441768	0.015271	0.129782
	NMS4PM1-23-17	36.5364		0	6.64721	36.1626	66.3487	49.6014	12.4927	0.373824	76219	0.638821	176.205	150.744	0.176238	0.000802334	1.32869	0.429657	0	0	255.83	0.039031	0.955491	0.00601557	1.02623
	NMS4PM1-23-18	58.4368	0.0308899	0	5.17549	48.3598	9.82127	108.567	23.6242	10.0461	2195.68	0.0266704	3.13848	3.62327	0.484604	0	1.77767	0.42284	0.921198	0.00271418	3.10153	0.0231124	0.725244	0	0.197067
	NMS4PM1-23-19	83.4218		0	9.37786	68.7806	12.6246	38.6701	82.7601	14.6411	2289.05	0.19745	1.55762	0.49961	0.0306528	0.0124498	1.38257	0.380916	3.01734	0.0857448	0.641798	0.00161893	0.280199	0.0168709	0.359731
	NMS4PM1-23-20	46.2018		0	4.50121	46.2018	1.39521	38.8852	39.7341		1302.99	0.489998	0.185098	3.0697	0.0477748	0	1.4169	0.945998	5.75213	0	0.291988	0.0269987	0.373075	0.0162753	0.0746627
	NMS4PM1-23-21	66.9835	0.00931334	0	3.71839	29.8503	2.6815	160.603	36.9027	37.1239	1281.52	0.015672	1.06977	3.86373	0	0.0292381	0.449455	0.707519	0.643085	0.151733	0.582416	0.0340335	0.458053	0.0150352	0.563897
	NMS4PM1-23-22	29.5926	0.0373936	0	3.01676	29.5552	15.1568	31.0702	64.3417		1696.42	0.094344	1.99415	1.5683	0.659983	0.043009	0.200071	0.683173	3.10864	0.0158092	0.245086	0.027557	0.0853472	0.0211876	0.276872
	NMS4PM1-23-23	8.01427		0	0.164325	4.81976	0.0679855	26.6884	16.1901	3.1945	1157.45		0.396265	1.07438	0.447686	0	0.140688	0	0	0.0378559	0.0758326	0.050551	0.0185507	0.0140411	0.0324828
	NMS4PM1-23-24	43.4742	0.309866	0	2.11597	17.8052	2.85034	161.094	11.1069	25.3591	1077.14		0.472258	103.1	0	0.0119079	0.366579	0	0	0.136542	0.410215	0.0190614	0.441759	0.0180465	0.287375
	NMS4PM1-23-25	52.7923	0.0928292	0.125872	0	42.9028	11.8971	71.6317	24.3626	9.79663	1299.47		0.837291	0.575304	0	0.0198972	1.25841	0.296707	2.62329	0	0.50351	0.03894	0.362243	0.0149849	0.298177
	NMS4PM1-23-26	3.1172		0	2.35733	3.1172	0.455683	22.9762	24.9463		935.712		0.495008	0.270324	0.593376	0	1.06561	0.783496	4.60582	0	0.0405655	0.0180417	0.274767	0	0
	NMS4PM1-23-27	20.7562	0.0729992	0	2.13223	18.0845	0	33.2307	13.8158	2.59868	1241.65		0.123453	0.976488	0	0	1.24582	0.37298	2.8057	0.000682433	0.138869	0.0304108	0.348779	0.00471775	0.0388637
	NMS4PM1-23-28	52.0026		0.129044	2.69018	35.9552	1.74865	74.6259	35.3278	16.0475	1301.28		0.227926	0.56438	0.3914	0.000435337	1.29989	0.619113	1.93442	0.112822	0.364126	0.00681582	0.315212	0.0196569	0.11116
Sujiquandong/Stage II	SJQDPM2-9-1	78.3965		0	1.53452	57.8255	9.29709	52.7975	23.129	20.571	941.901		0.499105	2.25654	0.110966	0.0198269	0.432444	0.286956	0	0.0790909	0.768963	0.0220299	0.174606	0.0192211	0.493432
2	SJQDPM2-9-2	72.6089	0.0758476	0.119986	5.74516	29.4211	3.045	166.813	36.9855	43.1119	1080.3	0.410831	0.261411	3.79675	0.382835	0.0162593	0.873316	0	0	0.335558	1.29762	0	0.354935	0.0203742	1.08629
3	SJQDPM2-9-3	22.896	0.0056876	0	1.9843	15.437	1.43628	58.1815	5.2883	7.45331	1117.73	0.541237	1.21283	6.1361	1.71092	0	0.47648	0.144444	0	0.12109	0.833023	0.00247612	0.212243	0.0355119	0.8095
4	SJQDPM2-9-4	50.5135	0.0258448	0	4.65628	23.7471	3.2236	95.6269	48.3412	26.7405	1055.48	0.547518	0	4.25222	0	0.0650062	0.624417	0.268331	0.109878	0.0591	0.757656	0.0300328	0.149804	0.0179331	0.726359
5	SJQDPM2-9-5	25.3473	0.0722346	0	7.26998	20.3607	1.74985	57.0811	38.0803	4.91435	917.948	0.306961	0.862564	13.0108	0	0.0522719	0.391588	1.84432	0	0.0310314	0.670802	0.0348716	0.306324	0.0223447	1.26486
6	SJQDPM2-9-6	13.1597		0	0.794235	5.06376	1.39426	44.2007	21.6027	8.09597	900.144		0.305134	6.42791	0.372961	0	0.361054	0.743287	5.93276	0.0873714	0.458523	0.0173571	0.164263	0.0979323	0.433269
7	SJQDPM2-9-7	25.1716		0	4.53883	13.356	2.34562	61.2476	19.1781	11.8156	1009.07		0.378615	2.85758	1.75441	0.00015964	0.577683	0.346471	4.06721	0.00934313	0.29306	0.023455	0.271658	0	0.312385
8	SJQDPM2-9-8	41.486	0.0164804	0	1.93071	25.8401	3.30709	82.4035	4.82045	15.6293	1029.79		0.273182	7.68425	0.686639	0.0575322	0.493758	0.129278	0	0.0918115	0.469448	0.0422379	0.116856	0.0289489	0.824687
9	SJQDPM2-9-9	27.6227	0.0185594	0.375714	5.22698	18.8247	1.40998	84.4052	18.4171	8.77939	891.213		0.981122	18.3233	0.997003	0.0189361	0.635821	0.699326	4.64007	0.0617326	0.891708	0.0254533	0.33618	0.0110243	0.580725
10	SJQDPM2-9-10	57.8524	0.0391874	0	0.683122	23.3407	5.28708	116.21	67.0977	34.4725	705.991		3.02031	17.7174	0.819442	0.0297068	0.514055	0.324058	2.00932	0.00588162	0.9335	0.0573484	0.170786	0	0.877173
11	SJQDPM2-9-11	40.4049		0	2.36187	20.9844	2.52259	126.559	30.3525	19.4206	994.359		0.838208	12.8679	0.283634	0.0258286	0.386709	0.536528	1.99406	0.0779124	0.813251	0.0385504	0.950046	0.017404	0.655938
12	SJQDPM2-9-12	37.5332		0	2.02765	22.1341	1.12755	98.8894	35.1989	15.3992	828.175	0.947475	0.35013	4.42079	0.0350859	0.0277798	0.63466	0.417843	3.35926	0	0.850498	0.0203929	0.509799	0.0411402	0.443295
13	SJQDPM2-9-13	43.2684	0.39297	0	2.49422	31.1274	4.66483	104.979	36.5712	11.748	930.925		0.188672	0.513673	0.0650637	0.0702972	0.494044	0.0718268	0	0	0.922222	0.0205026	0.156437	0.0127056	0.788942
14	SJQDPM2-9-14	45.7154	0.0740553	0	2.23395	37.7855	4.54652	38.9293	12.5941	7.85589	860.058		0.112399	0.407477	0	0.00916949	0.488917	0.00525983	0	0.0433973	0.301884	0.0102122	0.153865	0.00973581	0.176574
15	SJQDPM2-9-15	19.0377	0.0385108	0	0	15.1289	1.64044	37.63	17.8503	3.87029	1017.62	0.766328	0.212052	0.24959	0.242053	0.0234009	0.519902	0	0	0	0.727165	0	0.0692416	0	0.163805
16	SJQDPM2-9-16	19.9834	0.185481	0	2.84248	17.4951	0.335874	47.1536	16.936	2.30284	921.978	0.180492	0.507763	0.229612	0.900741	0.00707676	0.48481	0.266409	0	0.030646	0.458327	0.00283642	0.103728	0.0321697	0.356512
17	SJQDPM2-9-17	21.57	0.066771	0	2.88262	17.5498	2.28114	50.0846	32.1984	3.9534	931.852		0	0.610476	0.416498	0	0.421493	0.182388	0	0	0.713975	0.0224688	0.313582	0	0.512718
18	SJQDPM2-9-18	40.822	0.0262605	0.251838	5.41817	25.1879	6.55847	68.7616	34.3399	15.6078	1179.07	0.7722	0.056848	0.377845	0.133761	0.0339988	0.593357	0.285395	0	0.0294389	0.678781	0.0272421	0.130699	0.0247734	1.0304
19	SJQDPM2-9-19	35.1471	0.0203188	0	4.3529	21.6507	0.917164	65.7738	21.5447	13.4761	936.685	0.57681	0.114789	0.211972	0.199492	0.028843	0.434411	0.388384	1.55212	0.0215778	0.49503	0	0.25703	0.0248843	0.617213
20	SJQDPM2-9-20	28.4678	0.148628	0	3.37378	22.6275	1.94879	44.9212	25.4159	5.69161	839.868		0.273762	1.35075	0.295834	0.0295617	0.444751	0.0388155	0	0.040992	0.537949	0.0344441	0.205872	0.0158068	0.53836
21	SJQDPM1-14-1	32.1783	0.25101	0	4.13364	18.6613	6.81573	140.881	40.8623	13.266	972.004	0.339765	0.037183	0.0213951	0	0.0029072	1.84673	0.156322	0	0	1.37634	0.0531578	0.426074	0.0919754	0.862968
23	SJQDPM1-14-3	44.9874	0.54989	0	3.42384	29.7161	8.9187	197.178	32.4279	14.7214	1055	0.222633	0.107323	0.637752	0.240153	0.0159114	1.17236	0.0855161	0	0.0744151	1.79317	0.000397089	0.620991	0.03545	2.32064
24	SJQDPM1-14-4	36.8296	0.149812	0	0	24.3209	7.91378	124.497	28.0233	12.3589	808.071	0.580197	0.118705	3.45064	0.178712	0.00543072	1.37811	0	0	0.110313	1.64853	0.0547453	0.443131	0.0149595	0.739231
25	SJQDPM1-14-5	36.0568	0.0595287	0	1.24993	18.5002	13.1893	113.283	33.5407	17.4971	885.481	0.267072	0.440865	3.02924	0.418063	0.0361974	1.65768	0.44501	0	0	1.86343	0.0501401	0.599477	0.00395751	0.413839
26	SJQDPM1-14-6	24.6297	0.0152192	0	3.00561	8.97013	1.39278	88.7492	37.9802	15.6444	795.658		0.265644	0.0280246	0	0.0035467	2.43255	0.413768	0.0639393	0	0.841824	0.0109882	0.39833	0.0168824	0.238835
28	SJQDPM1-14-8	67.7214	0.38177	0	2.15463	20.677	1.10823	153.934	26.6648	46.6626	852.762	0.147126	0.129756	0.532324	0	0.100081	2.07272	0	0	0.0944964	0.959099	0.0290047	0.493628	0.00122161	0.447253
29	SJQDPM1-14-9	11.9384	0.0130161	0	1.06818	7.65659	0.0880524	44.8475	25.4976	4.26875	973.374		0	0	0	0.0231721	0.851414	0	0.590824	0.433443	0.404581	0.0257213	0.0693824	0	0.431512
30	SJQDPM1-14-10	40.4182	0.0133009	0	3.11092	18.5414	2.01302	123.476	16.5126	21.8636	871.034	0.420475	0.0925503	7.2845	0	0	2.05881	0.265594	0.660026	0.0428817	1.67824	0.0402097	0.823475	0.0365393	0.933072
31	SJQDPM1-14-11	36.6148	0.036936	0	4.0767	17.1027	0.350715	108.853	15.2335	19.4752	705.507	0.627556	0.351751	0	0	0	1.73299	0	0	0	0.970304	0.0368474	0.899097	0.023422	0.2741
34	SJQDPM1-14-14	54.5733	0.0139068	0	3.10258	46.0108	6.37464	97.0324	5.20244	8.54867	1014.92		1.42155	7.50283	0	0.005422	0.376664	0.26398	0.0789191	0.00617053	2.25092	0.023494	0.311098	0.0211708	0.851942
35	SJQDPM1-14-15	11.7584	0.0511609	0	2.67832	7.02389	1.92243	59.838	4.05615	4.68334	819.049	0.76511	0.0477769	0.865127	0.15917	0.00217583	0.727476	0.0727211	1.08216	0.0440855	0.907166	0.00298652	0.229436	0.036094	0.408842
36	SJQDPM1-14-16	18.6164	0.0670395	0	0.940363	12.8795	1.08923	60.1535	23.8799	5.66991	939.87		0.493084	0.717988	0.28472	0.00179425	0.877363	0.070074	0	0.0191496	1.14983	0	0.194164	0.0121004	0.480112
38	SJQDPM2-10-2	19.8844		0	2.70411	15.5841	0.983346	45.9173	10.1998	4.30033	1118.62	0.459496	0.416325	0.924641	0	0	0.455845	0	0	0	0.881801	0.0483713	0.183735	0.0289206	0.49471
39	SJQDPM2-10-3	20.5769	0.151455	0	3.08494	17.6162	8.72772	81.5745	18.6427	2.80923	1040.15		0.322081	6.92955	0.236174	0	0.556774	0.237851	0.851851	0.0197734	0.643407	0.0313424	0.13602	0	0.919071
40	SJQDPM2-10-4	25.2198	0.227908	0	3.30619	21.5777	1.70453	79.1032	0	3.41413	1049.33	1.96268	0.141544	1.47594	0.460647	0.0249046	0.698295	0.00165665	0	0.0550764	1.07835	0.0141351	0.207893	0.0155533	0.743008
41	SJQDPM2-10-5	16.4545	0.0265726	0	4.17576	12.1066	14.3934	46.7468	18.9739	4.32138	1201.02		0	0.353246	0	0.0454719	0.489233	0.257654	0	0.0483965	0.467737	0.00289945	0.176594	0.0120038	0.361429
42	SJQDPM2-10-6	33.7533		0	3.30505	10.4313	3.26168	109.93	10.897	23.3221	1282.8	0.171861	0.319937	1.69515	0	0	0.560418	0.251965	0.383939	1.31842	0.941731	0.0133031	0.333197	0	0.751079
43	SJQDPM2-10-7	21.9599	0.0677612	0	2.80194	16.238	2.51353	65.4302	36.4638	5.6542	1355.57		0.22845	0.0776155	0	0	0.799911	0.140608	0	0.0191627	0.822793	0.0289356	0.230907	0.0211609	0.451116
44	SJQDPM2-10-8	13.344		0	1.3345	8.75113	0.3028	58.5777	23.7548	4.59287	1068.44	0.201426	0.0783209	0.337664	0.110605	0	0.592691	0.152203	4.46408	0.049671	0.421094	0	0.448545	0.0226448	0.457092
45	SJQDPM2-10-9	23.9207	0.0166184	0	1.21694	18.5287	1.4265	50.7033	20.44	5.37536	1166.87	0.336598	0.323206	1.16257	0	0.024363	0.618329	0.314759	1.19806	0.0177897	0.661972	0.0169013	0.208632	0.0184579	0.350261
46	SJQDPM2-10-10	11.7178	0.0632033	0	3.58461	8.72885	0.667901	59.5487	0	2.92575	1148.68	0.146061	0.245549	0	0.204443	0.00291704	0.960245	0.17948	4.32175	0	0.51274	0.0355903	0.308512	0.0302725	0.298539
47	SJQDPM2-10-11	24.0398	0.16688	0	1.51651	14.8062	1.83186	59.7909	46.046	9.0667	1180.31		0.274208	2.80366	0.119073	0	0.491374	0.140154	0	0	0.715777	0.0209012	0.148284	0.00393357	0.517448
48	SJQDPM2-10-12	14.9926		0	3.4076	10.7793	0.243597	57.1932	22.6191	4.21333	898.126		0.354663	0	0.2873	0	0.508695	0.0287534	2.40397	0	0.618172	0.00757126	0.17755	0	0.680165
49	SJQDPM2-10-13	22.6351	0.0367336	0	3.24583	20.1985	0.983461	53.1385	25.46	2.39986	984.233		0.207441	0	0	0	0.56747	0	0	0	0.583424	0.0291899	0.153343	0.0125045	0.436205
50	SJQDPM2-10-14	14.3481	0.021478	0	1.07831	11.3521	0.338201	56.8016	40.0275	2.97452	778.802		0.277928	0.187702	0.333639	0.00224921	0.498782	0.358448	0	0.0227897	0.473655	0.0296645	0.259247	0.0167118	0.349703
51	SJQDPM2-10-15	19.5166	0.0816765	0	4.78192	10.9038	1.70487	77.1278	19.0613	8.53112	836.343		0.304476	1.08026	0	0	0.657798	0.151933	0	0.093225	0.718348	0.00709018	0.244445	0.0185226	0.985837
52	SJQDPM2-10-16	26.0012	0.0286429	0.104316	3.60064	12.0752	1.48019	56.5245	50.1211	13.8974	1082.52		0.227914	0.424255	0	0.0269633	0.473978	0	0	0.0129828	0.623403	0.0280035	0.205359	0.167567	0.494935
