# Supplementary material
Source: publisher figshare collection journal article supplement (https://gsapubs.figshare.com/articles/dataset/_/21919395)
Supplement: Supplementary file 1 [file 1]

Gu, X., Zhang, Y., Ge, Z., and Chen, W., 2023, Mineralization and genesis of the orogenic gold system in the Kalamaili area, East Junggar, Xinjiang, northwestern China: GSA Bulletin, <https://doi.org/10.1130/B36650.1>.

## Supplemental Material

**Figure S1.** Field photographs of regional deformation.

**Figure S2.** Jinshuiquan fluid inclusions.

**Figure S3.** Nanmingshui fluid inclusions.

**Figure S4.** Sujiquandong fluid inclusions.

**Table S1.** Concentrations of Trace Elements in Quartz from the Gold Deposits at Kalamaili

**Table S2.** LA-ICP-MS U-Pb Dating Results of Zircons from the Auriferous Quartz Vein in the Nanmingshui Gold Deposit

**Table S3.** Rare Earth Element (REE) Concentrations of Zircons from the Auriferous Quartz Vein in the Nanmingshui Gold Deposit

Figure S1. Field photographs showing three generations of deformation in the Kalamaili area. (A) Macroscopic view of the NW-trending Kalamaili fault zone, with a strike length over 150 km and a width of  $\approx 100$  m. (B) Intensive regional cleavages (S1) in the lower greenschist facies tuffaceous siltstones and slates of the Lower Carboniferous Jiangbasitao formation at Hongliugou, which are related to the N-S thrusting and compression during the earliest deformation (D1). (C) The auriferous quartz-tourmaline vein at the Nanmingshui deposit is hosted in the NW-trending subsidiary fault that formed during sinistral strike-slip movement (D2) of the regional Kalamaili shear zone. The ore vein crosscuts the earlier regional cleavages (S1). (D) Deformation of both earlier cleavages and auriferous quartz veins due to superimposition of the latest dextral strike-slip movement (D3).

Figure S2.  $T_m, CO_2$ ,  $T_m, cl_a$ ,  $Th, CO_2(l)$ , and  $Th, tot$  histograms for fluid inclusions in the Jinshuiquan gold deposit.

Figure S3.  $T_m, CO_2$ ,  $T_m, cl_a$ ,  $Th, CO_2(l)$ , and  $Th, tot$  histograms for fluid inclusions in the Nanmingshui gold deposit.

Figure S4.  $T_m, CO_2$ ,  $T_m, cl_a$ ,  $Th, CO_2(l)$ , and  $Th, tot$  histograms for fluid inclusions in the Sujiquandong gold deposit.

Table S1. Concentrations of Trace Elements in Quartz from the Gold Deposits at Kalamaili.

Table S2. LA-ICP-MS U-Pb Dating Results of Zircons from the Auriferous Quartz Vein in the Nanmingshui Gold Deposit.

Table S3. Rare Earth Element (REE) Concentrations of Zircons from the Auriferous Quartz Vein in the Nanmingshui Gold Deposit.

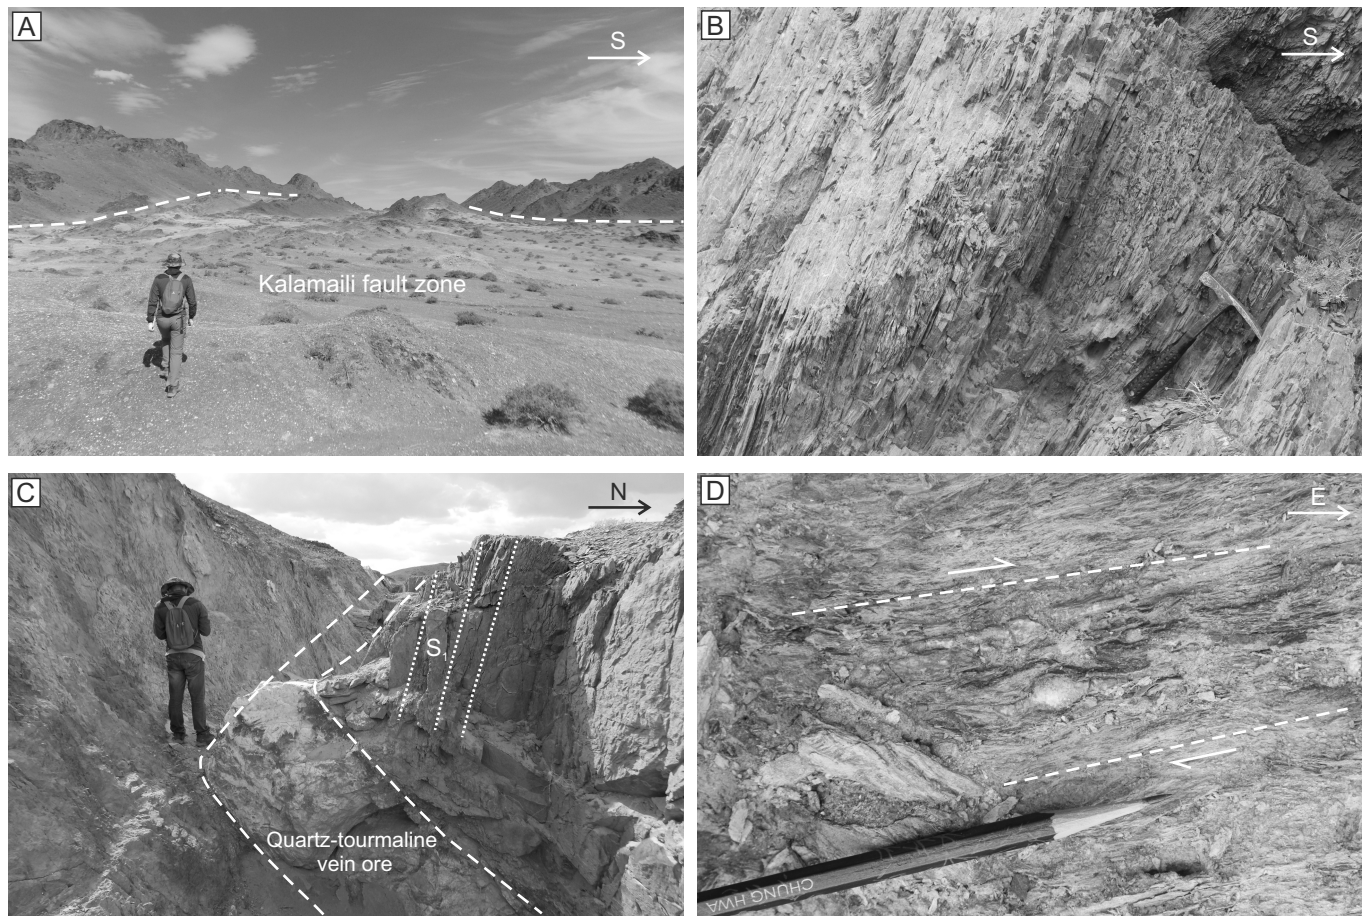

Gu et al., Figure S1, B36650

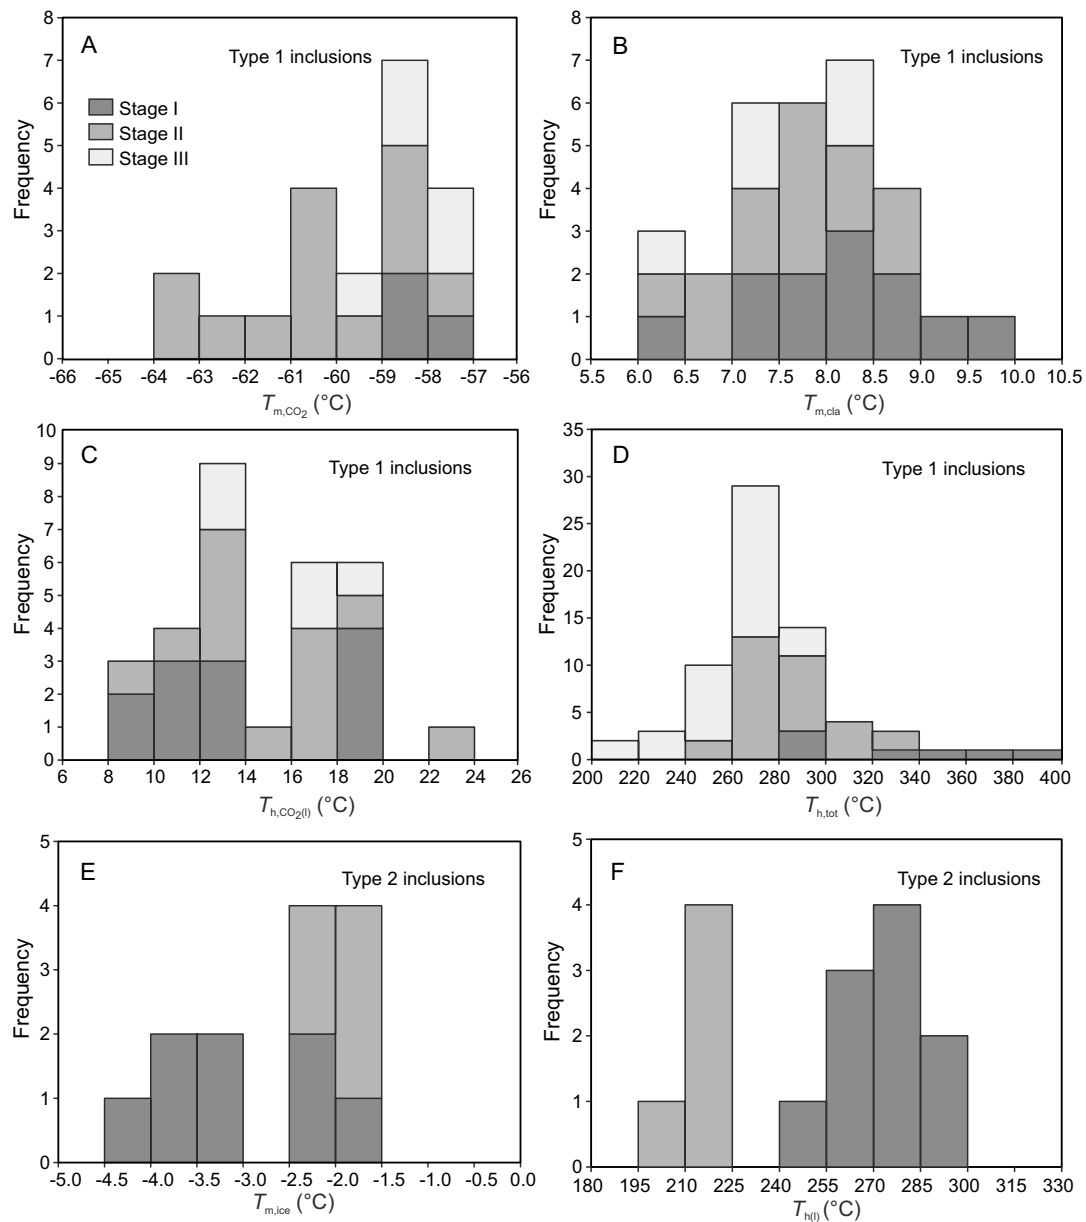

Gu et al., Figure S2, B36650



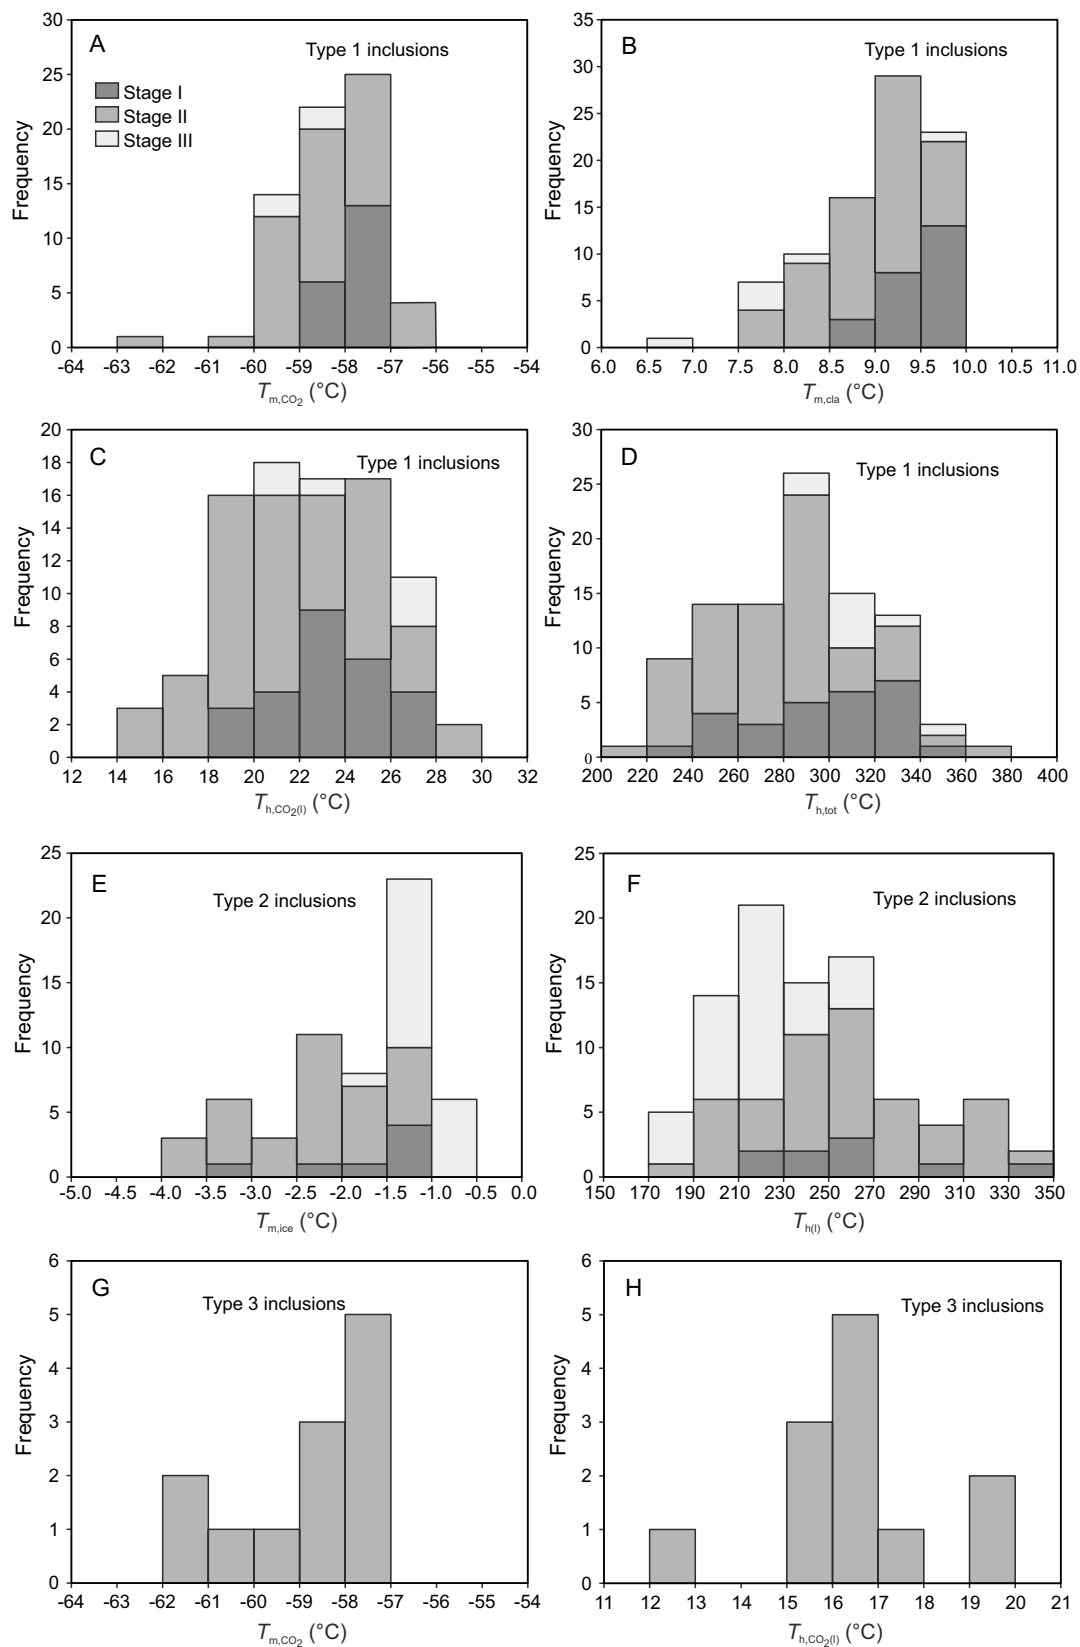

Gu et al., Figure S3, B36650

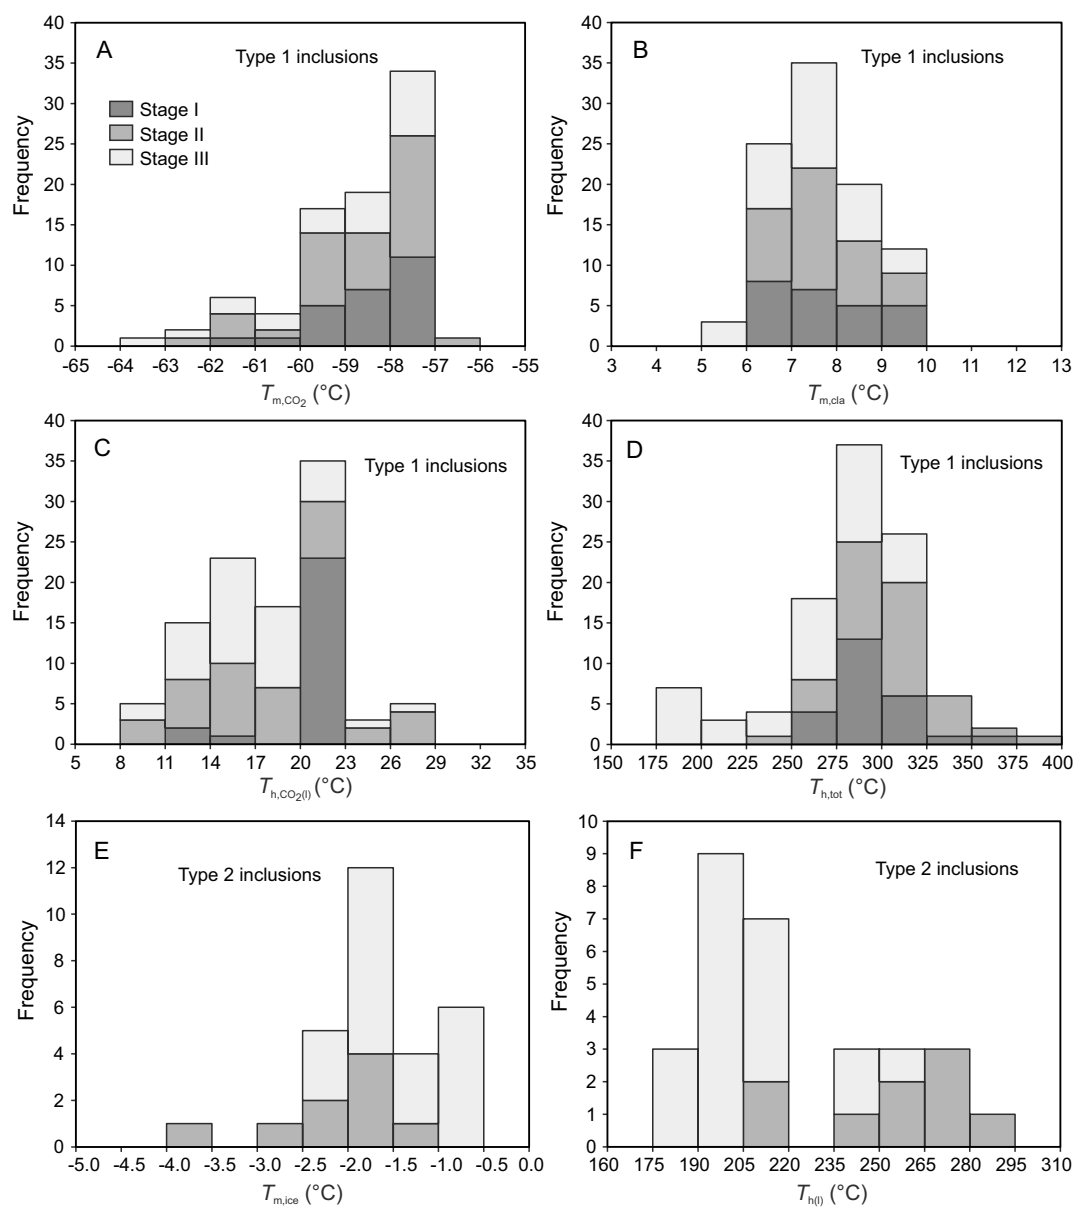

Gu et al., Figure S4, B36650

Table S2. LA-ICP-MS U-Pb Dating Results of Zircons from the Auriferous Quartz Vein in the Nanmingshui Gold Deposit

| Grains                        | Th    | U     | Th/U | Isotope ratios                       |         |                                     |         |                                     |         | Age (Ma)                             |     |                                     |    |                                     |    |
|-------------------------------|-------|-------|------|--------------------------------------|---------|-------------------------------------|---------|-------------------------------------|---------|--------------------------------------|-----|-------------------------------------|----|-------------------------------------|----|
|                               | (ppm) | (ppm) |      | <sup>207</sup> Pb/ <sup>206</sup> Pb | 1σ      | <sup>207</sup> Pb/ <sup>235</sup> U | 1σ      | <sup>206</sup> Pb/ <sup>238</sup> U | 1σ      | <sup>207</sup> Pb/ <sup>206</sup> Pb | 1σ  | <sup>207</sup> Pb/ <sup>235</sup> U | 1σ | <sup>206</sup> Pb/ <sup>238</sup> U | 1σ |
| Type 1 Zircons (Magmatic)     |       |       |      |                                      |         |                                     |         |                                     |         |                                      |     |                                     |    |                                     |    |
| 1                             | 120   | 294   | 0.41 | 0.05476                              | 0.00317 | 0.50706                             | 0.02623 | 0.06678                             | 0.00106 | 403                                  | 87  | 416                                 | 18 | 417                                 | 6  |
| 2                             | 23    | 324   | 0.07 | 0.05524                              | 0.0031  | 0.50259                             | 0.02612 | 0.06566                             | 0.00103 | 422                                  | 88  | 413                                 | 18 | 410                                 | 6  |
| 3                             | 100   | 180   | 0.56 | 0.0553                               | 0.00363 | 0.50635                             | 0.03299 | 0.06684                             | 0.00123 | 424                                  | 113 | 416                                 | 22 | 417                                 | 7  |
| 4                             | 85    | 166   | 0.51 | 0.05997                              | 0.00475 | 0.56159                             | 0.04445 | 0.06718                             | 0.00158 | 602                                  | 131 | 453                                 | 29 | 419                                 | 10 |
| 5                             | 330   | 349   | 0.95 | 0.0546                               | 0.00261 | 0.50572                             | 0.02258 | 0.06672                             | 0.0011  | 396                                  | 70  | 416                                 | 15 | 416                                 | 7  |
| 6                             | 63    | 223   | 0.28 | 0.05331                              | 0.00367 | 0.46377                             | 0.02878 | 0.06177                             | 0.00135 | 342                                  | 101 | 387                                 | 20 | 386                                 | 8  |
| 7                             | 110   | 221   | 0.5  | 0.05183                              | 0.00421 | 0.44588                             | 0.03895 | 0.06059                             | 0.00122 | 278                                  | 161 | 374                                 | 27 | 379                                 | 7  |
| 8                             | 75    | 154   | 0.49 | 0.05898                              | 0.0049  | 0.50026                             | 0.04141 | 0.06164                             | 0.00148 | 566                                  | 139 | 412                                 | 28 | 386                                 | 9  |
| Type 2 Zircons (Hydrothermal) |       |       |      |                                      |         |                                     |         |                                     |         |                                      |     |                                     |    |                                     |    |
| 9                             | 174   | 339   | 0.51 | 0.05335                              | 0.0032  | 0.36637                             | 0.02043 | 0.05036                             | 0.00088 | 344                                  | 94  | 317                                 | 15 | 317                                 | 5  |
| 10                            | 230   | 490   | 0.47 | 0.0563                               | 0.00271 | 0.38555                             | 0.01826 | 0.04882                             | 0.00076 | 464                                  | 77  | 331                                 | 13 | 307                                 | 5  |
| 11                            | 113   | 213   | 0.53 | 0.05209                              | 0.00929 | 0.40477                             | 0.10439 | 0.04966                             | 0.00451 | 289                                  | 360 | 345                                 | 75 | 312                                 | 28 |
| 12                            | 151   | 291   | 0.52 | 0.05852                              | 0.00333 | 0.40967                             | 0.02334 | 0.05039                             | 0.00099 | 549                                  | 90  | 349                                 | 17 | 317                                 | 6  |
| 13                            | 197   | 260   | 0.76 | 0.06019                              | 0.00552 | 0.39964                             | 0.0311  | 0.04944                             | 0.00118 | 610                                  | 127 | 341                                 | 23 | 311                                 | 7  |
| 14                            | 162   | 457   | 0.36 | 0.05801                              | 0.00271 | 0.39922                             | 0.01775 | 0.04976                             | 0.00072 | 530                                  | 72  | 341                                 | 13 | 313                                 | 4  |

Table S3. Rare Earth Element (REE) Concentrations of Zircons from the Auriferous Quartz Vein in the Nanmingshui Gold Deposit

| Grains                                                                                                                                                                                                                                                                         | La    | Ce     | Pr    | Nd    | Sm    | Eu    | Gd    | Tb    | Dy     | Ho     | Er     | Tm     | Yb      | Lu     | Ce/Ce* | Eu/Eu* | ΣLREE  | (Sm/La) <sub>N</sub> | (Sm/Ce) <sub>N</sub> | (Tb/Yb) <sub>N</sub> |
|--------------------------------------------------------------------------------------------------------------------------------------------------------------------------------------------------------------------------------------------------------------------------------|-------|--------|-------|-------|-------|-------|-------|-------|--------|--------|--------|--------|---------|--------|--------|--------|--------|----------------------|----------------------|----------------------|
|                                                                                                                                                                                                                                                                                | (ppm) | (ppm)  | (ppm) | (ppm) | (ppm) | (ppm) | (ppm) | (ppm) | (ppm)  | (ppm)  | (ppm)  | (ppm)  | (ppm)   | (ppm)  |        |        |        |                      |                      |                      |
| Type 1 Zircons (Magmatic)                                                                                                                                                                                                                                                      |       |        |       |       |       |       |       |       |        |        |        |        |         |        |        |        |        |                      |                      |                      |
| 1                                                                                                                                                                                                                                                                              | 0.19  | 5.96   | 0.18  | 3.38  | 8.65  | 1.38  | 64.27 | 27.21 | 385.44 | 155.66 | 724.96 | 168.60 | 1584.96 | 255.51 | 7.80   | 0.18   | 18.36  | 72.90                | 18.36                | 6.01                 |
| 2                                                                                                                                                                                                                                                                              | 0.01  | 1.30   | 0.01  | 0.50  | 2.14  | 0.36  | 21.26 | 12.96 | 203.63 | 89.43  | 468.37 | 122.96 | 1293.87 | 221.39 | 31.45  | 0.16   | 3.96   | 342.69               | 3.96                 | 6.82                 |
| 3                                                                                                                                                                                                                                                                              | 0.01  | 14.17  | 0.03  | 0.96  | 2.21  | 0.42  | 16.65 | 6.13  | 82.67  | 33.03  | 155.11 | 37.13  | 363.37  | 62.97  | 197.92 | 0.21   | 17.38  | 353.90               | 17.38                | 0.65                 |
| 4                                                                                                                                                                                                                                                                              | 0.28  | 8.84   | 0.15  | 2.43  | 5.04  | 0.97  | 36.89 | 17.06 | 232.19 | 90.87  | 426.65 | 99.78  | 943.05  | 148.58 | 10.44  | 0.22   | 16.74  | 28.82                | 16.74                | 2.36                 |
| 5                                                                                                                                                                                                                                                                              | 0.47  | 29.42  | 0.52  | 5.98  | 11.35 | 1.97  | 65.89 | 23.59 | 295.88 | 110.14 | 465.69 | 98.65  | 889.19  | 140.23 | 14.40  | 0.22   | 47.74  | 38.67                | 47.74                | 1.60                 |
| 6                                                                                                                                                                                                                                                                              | 0.02  | 4.28   | 0.04  | 1.30  | 4.91  | 0.84  | 37.81 | 17.02 | 230.96 | 95.91  | 438.47 | 103.68 | 977.34  | 158.28 | 36.61  | 0.19   | 10.55  | 393.13               | 10.55                | 4.75                 |
| 7                                                                                                                                                                                                                                                                              | 0.07  | 5.89   | 0.22  | 2.75  | 8.66  | 1.56  | 60.73 | 24.03 | 306.84 | 117.16 | 514.87 | 116.07 | 1070.14 | 170.42 | 11.48  | 0.21   | 17.59  | 198.11               | 17.59                | 6.09                 |
| 8                                                                                                                                                                                                                                                                              | 0.01  | 16.2   | 0.08  | 1.68  | 3.98  | 1.35  | 32.24 | 12.08 | 167.85 | 65.49  | 306.38 | 74.72  | 728.45  | 117.11 | 138.57 | 0.36   | 21.95  | 637.34               | 21.95                | 1.02                 |
| Type 2 Zircons (Hydrothermal)                                                                                                                                                                                                                                                  |       |        |       |       |       |       |       |       |        |        |        |        |         |        |        |        |        |                      |                      |                      |
| 9                                                                                                                                                                                                                                                                              | 1.41  | 12.39  | 0.40  | 1.86  | 2.21  | 0.37  | 11.50 | 4.84  | 63.80  | 25.97  | 127.28 | 32.02  | 335.73  | 56.68  | 3.99   | 0.22   | 18.27  | 2.51                 | 18.27                | 0.74                 |
| 10                                                                                                                                                                                                                                                                             | 59.10 | 141.18 | 15.99 | 74.95 | 17.48 | 1.15  | 33.19 | 8.71  | 104.17 | 41.59  | 207.67 | 51.86  | 532.74  | 92.34  | 1.11   | 0.15   | 308.70 | 0.47                 | 308.70               | 0.51                 |
| 11                                                                                                                                                                                                                                                                             | 1.08  | 21.17  | 0.43  | 3.23  | 3.93  | 0.76  | 23.77 | 9.47  | 123.50 | 46.37  | 209.87 | 47.78  | 452.31  | 73.15  | 7.52   | 0.24   | 29.84  | 5.83                 | 29.84                | 0.77                 |
| 12                                                                                                                                                                                                                                                                             | 0.82  | 13.60  | 0.30  | 2.54  | 3.64  | 0.75  | 21.41 | 8.62  | 108.12 | 44.59  | 210.00 | 51.37  | 509.32  | 90.08  | 6.63   | 0.26   | 20.90  | 7.11                 | 20.90                | 1.11                 |
| 13                                                                                                                                                                                                                                                                             | 38.36 | 104.40 | 11.40 | 58.75 | 21.16 | 3.05  | 84.65 | 26.19 | 296.53 | 106.92 | 455.84 | 98.33  | 883.75  | 144.69 | 1.21   | 0.22   | 234.07 | 0.88                 | 234.07               | 0.84                 |
| 14                                                                                                                                                                                                                                                                             | 9.20  | 50.75  | 2.83  | 14.50 | 4.80  | 0.37  | 15.38 | 6.20  | 80.90  | 34.93  | 184.86 | 49.47  | 518.54  | 93.40  | 2.41   | 0.13   | 82.08  | 0.84                 | 82.08                | 0.39                 |
| Note: Ce/Ce* = (Ce) <sub>N</sub> /[(La) <sub>N</sub> ×(Pr) <sub>N</sub> ] <sup>1/2</sup> , Eu/Eu* = (Eu) <sub>N</sub> /[(Sm) <sub>N</sub> ×(Gd) <sub>N</sub> ] <sup>1/2</sup> , ΣLREE = Σ(La–Sm), chondrite-normalizing values from <a href="#">McDonough and Sun (1995)</a> . |       |        |       |       |       |       |       |       |        |        |        |        |         |        |        |        |        |                      |                      |                      |
